# Supplementary material
Source: MDPI journal article supplement (https://www.mdpi.com/2673-964X/3/4/19)
Supplement: s1 [file s1]

# Supplementary Materials: Bioavailability Assessment of Metals from the Coastal Sediments of Tropical Estuaries Based on Acid-Volatile Sulfide and Simultaneously Extracted Metals

**Table 1.** ICP OES operating conditions, detection limits and recoveries obtained for the determination of metals in acid extractions carried out in sediments.

| Parameters                                                | Value                    |
|-----------------------------------------------------------|--------------------------|
| Incident Power (W)                                        | 1.200                    |
| Plasma Gas Flow (L min <sup>-1</sup> )                    | 12                       |
| Coating Gas Flow (L min <sup>-1</sup> )                   | 0,2                      |
| Misting gas flow (L min <sup>-1</sup> )                   | 0,02                     |
| Nebulizer pressure (bar)                                  | 1,0                      |
| Sample Input Flow (mL min <sup>-1</sup> )                 | 1,0                      |
| Integration Time (s)                                      | 1                        |
| Resolution                                                | High                     |
| Wavelength (nm)                                           | Cd: $\lambda = 226,502$  |
|                                                           | Cu: $\lambda = 324,750$  |
|                                                           | Fe: $\lambda = 259,940$  |
|                                                           | Mn: $\lambda = 257,610$  |
|                                                           | Ni: $\lambda = 231,604$  |
|                                                           | Pb: $\lambda = 220,353$  |
|                                                           | Zn: $\lambda = 231,856$  |
| Detection Limits (mg Kg <sup>-1</sup> )                   | Cd: 0,01                 |
|                                                           | Cu: 0,01                 |
|                                                           | Fe: 13,0                 |
|                                                           | Mn: 0,18                 |
|                                                           | Ni: 0,01                 |
|                                                           | Pb: 0,02                 |
|                                                           | Zn: 0,02                 |
| Concentrations in certified sample (mg Kg <sup>-1</sup> ) | Cu: 2.428                |
|                                                           | Fe: 252.687              |
|                                                           | Mn: 266                  |
|                                                           | Ni: 103                  |
|                                                           | Pb: 529                  |
|                                                           | Zn: 1.172                |
| Certified Value (SRM NIST 2782) (mg Kg <sup>-1</sup> )    | Cu: $2.435 \pm 47$       |
|                                                           | Fe: $254.000 \pm 16.000$ |
|                                                           | Mn: $258 \pm 15$         |
|                                                           | Ni: $95,9 \pm 4,7$       |
|                                                           | Pb: $554 \pm 36$         |
|                                                           | Zn: $1.167 \pm 57$       |
| Method Recovery (%)                                       | Cu: 99,7                 |
|                                                           | Fe: 99,5                 |
|                                                           | Mn: 103,1                |
|                                                           | Ni: 107,4                |
|                                                           | Pb: 95,5                 |
|                                                           | Zn: 100,4                |
